# Supplementary material
Source: PubMed Central journal article supplement (PMC5134978)
Supplement: supp_tpc.16.00359_TPC2016-00359-RAR2_Supplemental_Data.pdf [file supp_tpc.16.00359_TPC2016-00359-RAR2_Supplemental_Data.pdf]

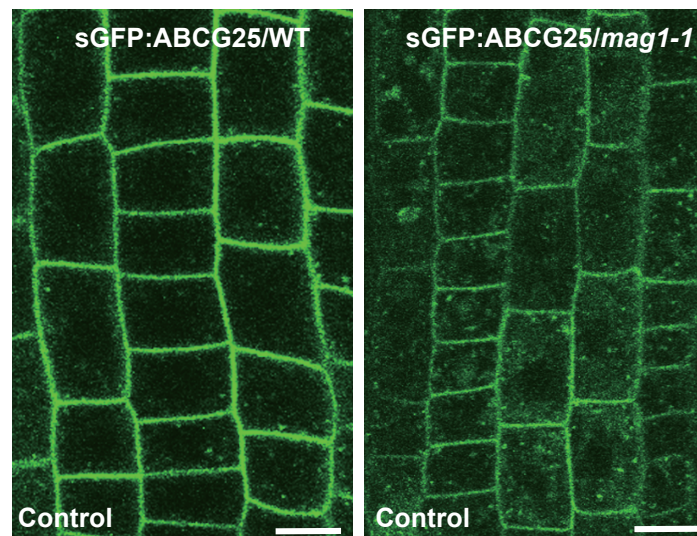

**Supplemental Figure S1. Subcellular localization of sGFP:ABCG25 in *mag1-1* mutant plants.**

WT and *mag1-1* plants harboring *sGFP:ABCG25* were grown in 1/2 MS medium, and the localization of sGFP:ABCG25 was examined. Scale bars = 10  $\mu$ m.

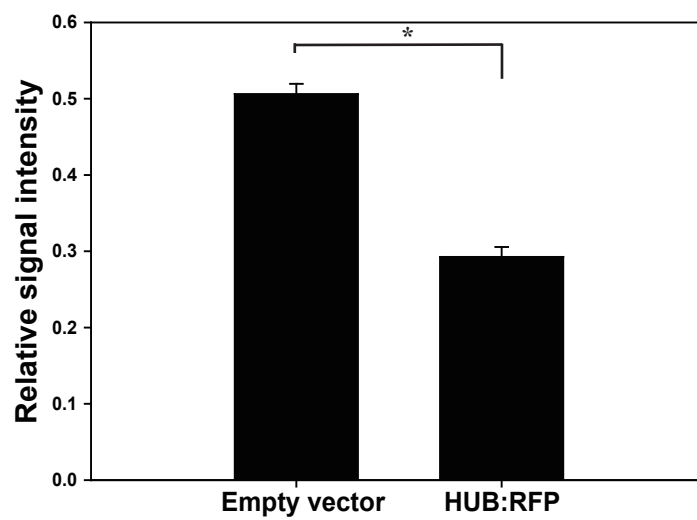

**Supplemental Figure S2. Accumulation of ABCG25 at BFA bodies is inhibited by HUB.**

sGFP:ABCG25 in vector control and HUB:RFP-transgenic plants grown in the presence of 4-hydroxytamoxifen for 2 days and then treated with 50  $\mu$ M BFA for 30 min. The mean pixel intensity at the cytosolic side and adjacent PM was measured separately, and the ratio was calculated. Asterisks indicate significant differences (Student's t-test,  $P < 0.05$ ). Error bars, SD; number of cells ( $n$ ) = 26.

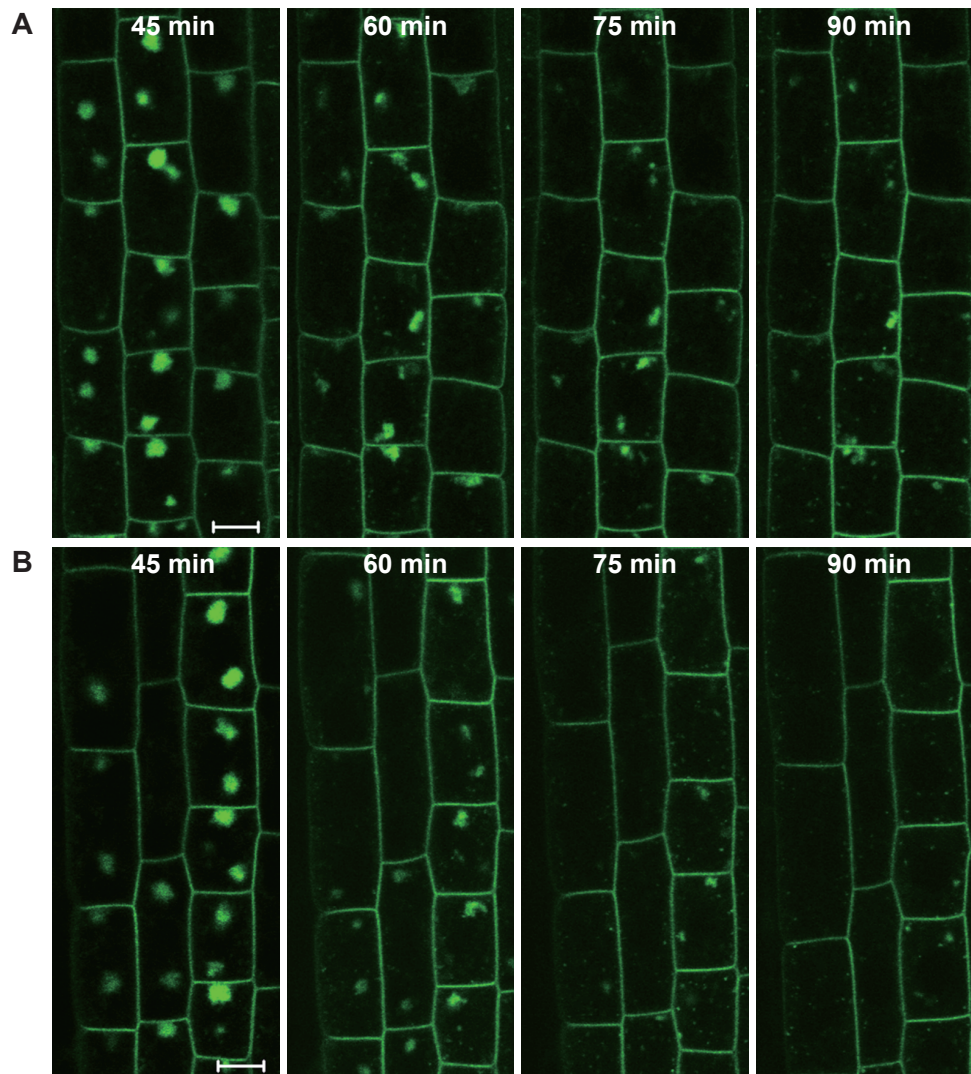

**Supplemental Figure S3. Time-course images of sGFP:ABCG25 after BFA washout in the presence and absence of ABA.**

Effect of ABA on the recycling of sGFP:ABCG25 was examined in a time-dependent manner. Seedlings (5 days old) harboring sGFP:ABCG25 were treated with 50 μM BFA for 1 h and then transferred to 1/2 MS liquid media supplemented with DMSO (A) or 20 μM ABA (B). After 45 min, the disappearance of sGFP:ABCG25 from the BFA bodies was monitored at 15 min intervals. Images of a single focal plane are shown. Scale bars = 10 μm.

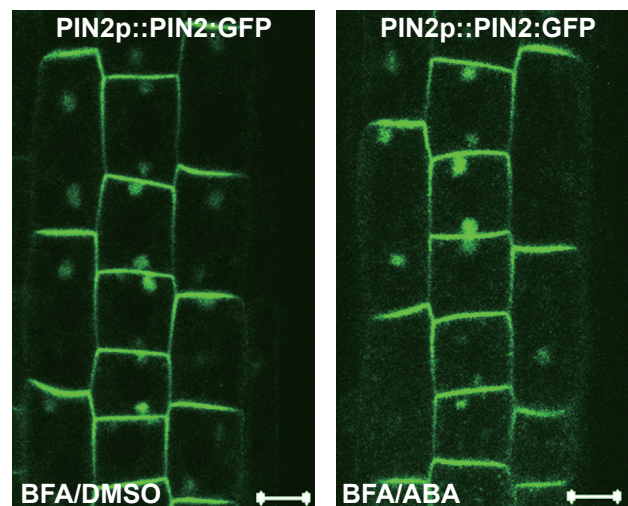

**Supplemental Figure S4. Exogenous application of ABA does not affect recycling of PIN2:GFP.**

Recycling of PIN2:GFP was examined in the presence of DMSO or ABA. Seedlings (5-day-old) were treated with 50 μM BFA for 1 h and transferred to 1/2 MS media containing DMSO or ABA. The images were captured 1 h after BFA washout. Scale bars = 10 μm.

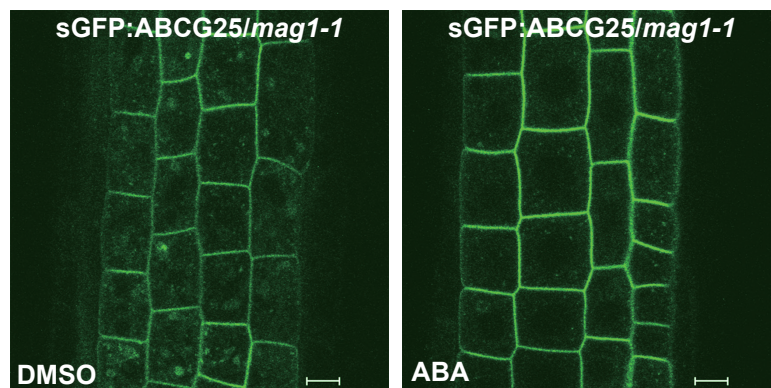

**Supplemental Figure S5. *mag1-1* plants do not show any defect in recycling of sGFP:ABCG25.**

*mag1-1* plants harboring *sGFP:ABCG25* were incubated in 1/2 MS media containing DMSO or 10  $\mu$ M ABA for 5 h, and the localization of sGFP:ABCG25 was examined. Scale bars = 10  $\mu$ m.

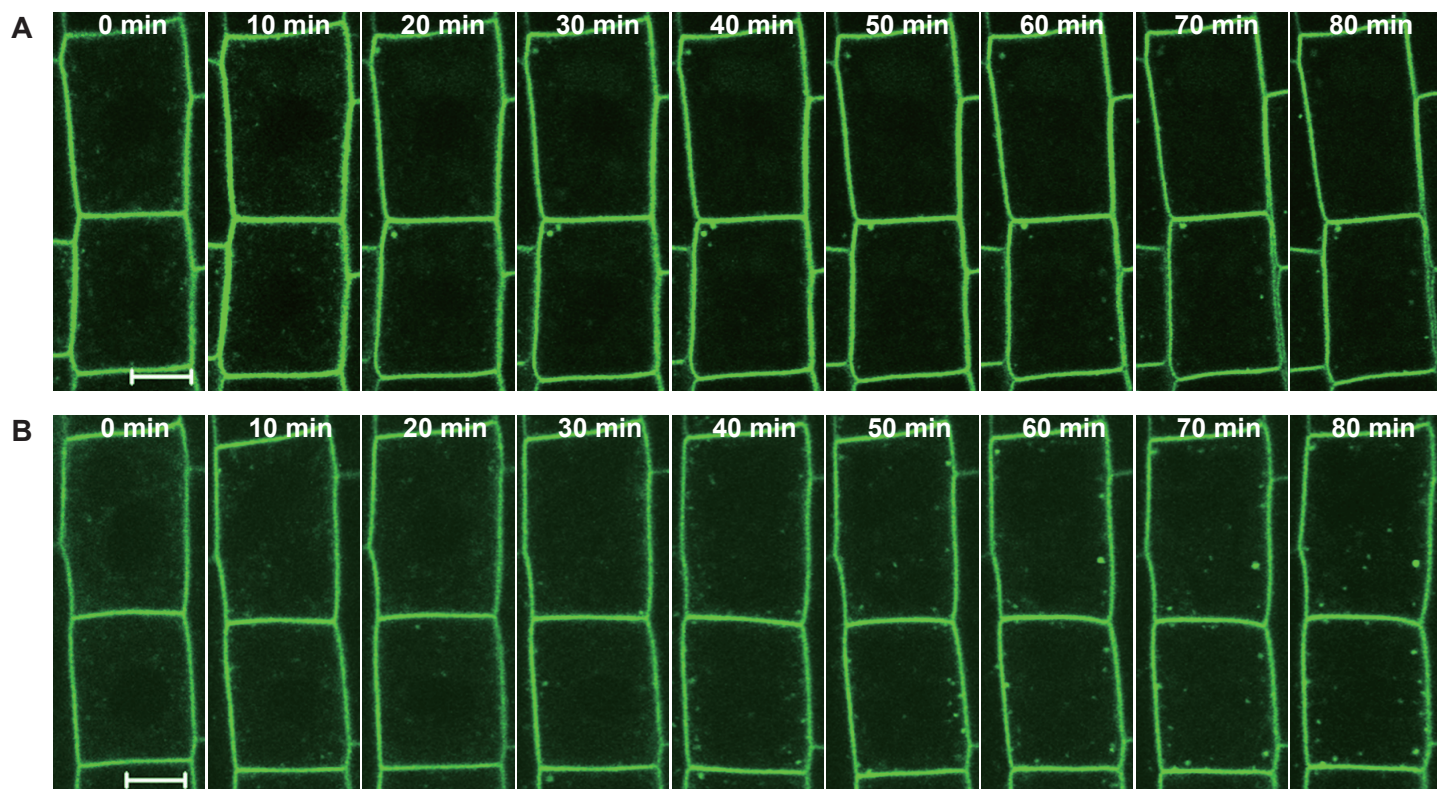

**Supplemental Figure S6. Time-course images of sGFP:ABCG25 during endocytosis in the presence and absence of NaCl stress.**

The effect of NaCl stress on endocytosis of sGFP:ABCG25 was examined in a time-dependent manner. Seedlings (5 days old) harboring sGFP:ABCG25 were treated with water (A) or 100 mM NaCl (B), and endocytosis of sGFP:ABCG25 was monitored every 10 min using a LSCM. Images of a single focal plane are shown. Scale bars = 10  $\mu$ m.

**Supplemental Table S1. The nucleotide sequences of primers used in this study**

| Name           | Nucleotide sequence (5' to 3')      |
|----------------|-------------------------------------|
| BamHI/ABCG25-F | CGGGATCCATGTCAGCTTTTGACGGCGTTGAAA   |
| XhoI/ABCG25-R  | CCCTCGAGTTAATGTTTGATACGTCTCAAAGCTAG |
| AP2M-LP        | GCACAAAGAAAAGTCAGTGGC               |
| AP2M-RP        | GCAATGCTAATGTTGCTTGTG               |
